# Supplementary material for: An improved selective/differential medium for culturing the Bacteroides fragilis group from wastewater
Source: Royal Society of Chemistry journal article supplement (doi:10.1039/d2ay00526c), 2022-01-01
Supplement: d2ay00526c1.pdf [file d2ay00526c1.pdf]

Table S1. The results of the first stage of research

| No strain | Strain identification                                                 |           |             |             |           |            | Accession                        |
|-----------|-----------------------------------------------------------------------|-----------|-------------|-------------|-----------|------------|----------------------------------|
|           | Identification results                                                | Max Score | Total Score | Query Cover | E value   | Per. Ident |                                  |
| 1         | <i>Raoultella ornithinolytica</i>                                     | 2159      | 2159        | 96%         | 0         | 97.22%     | MT568560.1                       |
| 2         | <i>Providencia vermicola</i>                                          | 2206      | 2206        | 96%         | 0         | 98.86%     | MK780045.1                       |
| 3         | <i>Klebsiella pneumoniae</i>                                          | 2115      | 2115        | 99%         | 0         | 98.90%     | MN208189.1                       |
| 4         | <i>Klebsiella pneumoniae</i>                                          | 2110      | 2110        | 92%         | 0         | 98.20%     | MK156319.1                       |
| 5         | <i>Kluyvera cryocrescens</i>                                          | 1663      | 1663        | 98%         | 0         | 88.94%     | LC060917.1                       |
| 6         | <i>Klebsiella pneumoniae</i>                                          | 2137      | 2137        | 90%         | 0         | 99.08%     | KJ803912.1                       |
| 7         | <i>Raoultella ornithinolytica</i>                                     | 2159      | 2159        | 96%         | 0         | 97.22%     | MT568560.1                       |
| 8         | <i>Providencia vermicola</i>                                          | 1803      | 1803        | 88%         | 0         | 98.62%     | KC456588.1                       |
| 9         | Unknown                                                               |           |             |             |           |            |                                  |
| 10        | <i>Providencia vermicola</i>                                          | 2206      | 2206        | 96%         | 0         | 98.86%     | MK780045.1                       |
| 11        | <i>Klebsiella pneumoniae</i>                                          | 2115      | 2115        | 89%         | 0         | 98.90%     | MN208189.1                       |
| 12        | <i>Klebsiella oxytoca</i>                                             | 2217      | 2217        | 99%         | 0         | 97.45%     | MT509939.1                       |
| 13        | <i>Enterobacter cloacae</i>                                           | 2163      | 2163        | 95%         | 0         | 98.52%     | KY524293.1                       |
| 14        | <i>Pantoea agglomerans</i>                                            | 806       | 806         | 76%         | 0         | 80.54%     | MN006238.1                       |
| 15        | <i>Aeromonas allosaccharophila</i>                                    | 2117      | 2117        | 88%         | 0         | 98.90%     | MN208205.1                       |
| 16        | <i>Kluyvera cryocrescens</i>                                          | 1663      | 1663        | 98%         | 0         | 88.94%     | LC060917.1                       |
| 17        | <i>Kluyvera ascorbata</i>                                             | 1295      | 1295        | 90%         | 0         | 83.83%     | MT611553.1                       |
| 18        | <i>Kluyvera ascorbata</i>                                             | 2145      | 2145        | 90%         | 0         | 99.08%     | MT611553.1                       |
| 19        | <i>Raoultella ornithinolytica</i>                                     | 2152      | 2152        | 97%         | 0         | 99.08%     | MT545114.1                       |
| 20        | <i>Kluyvera cryocrescens</i>                                          | 1899      | 1899        | 94%         | 0         | 94.71%     | LC060917.1                       |
| 21        | <i>Providencia rettgeri</i>                                           | 2194      | 15314       | 95%         | 0         | 99.26%     | CP059345.1                       |
| 22        | <i>Providencia vermicola</i>                                          | 1810      | 1810        | 98%         | 0         | 92.10%     | KC456565.1                       |
| 23        | <i>Enterobacter hormaechei</i>                                        | 2143      | 2143        | 94%         | 0         | 98.75%     | KF836497.1                       |
| 24        | <i>Enterobacter asburiae</i>                                          | 2089      | 16586       | 95%         | 0         | 97.53%     | CP034336.1                       |
| 25        | <i>Citrobacter freundii</i>                                           | 2163      | 2163        | 98%         | 0         | 96.00%     | KY378909.1                       |
| 26        | <i>Klebsiella pneumoniae</i>                                          | 2226      | 2226        | 99%         | 0         | 97.30%     | MN208189.1                       |
| 27        | <i>Klebsiella pneumoniae</i>                                          | 2178      | 2178        | 98%         | 0         | 97.69%     | MF767577.1                       |
| 28        | <i>Klebsiella oxytoca</i>                                             | 2117      | 2117        | 90%         | 0         | 98.66%     | KM349412.1                       |
| 29        | <i>Klebsiella pneumoniae</i>                                          | 2137      | 2137        | 92%         | 0         | 99.08%     | KJ803912.1                       |
| 30        | <i>Raoultella sp.</i>                                                 | 2180      | 2180        | 99%         | 0         | 96.98%     | MT545114.1 KC456530.1            |
| 31        | <i>Klebsiella pneumoniae</i>                                          | 2154      | 16767       | 91%         | 0         | 99.49%     | CP041644.1                       |
| 32        | <i>Klebsiella pneumoniae</i>                                          | 2182      | 2182        | 95%         | 0         | 98.23%     | MN208189.1                       |
| 33        | <i>Klebsiella pneumoniae</i>                                          | 2145      | 16617       | 94%         | 0         | 98.21%     | CP054268.1                       |
| 34        | <i>Providencia sp.</i>                                                | 2154      | 2154        | 98%         | 0         | 97.75%     | MK780045.1 MK780040.1 CP017671.1 |
| 35        | <i>Salmonella enterica subsp. enterica serovar Typhimurium strain</i> | 135       | 135         | 43%         | 5.00E-27  | 70.60%     | MH352182.1                       |
| 36        | <i>Enterobacter sp.</i>                                               | 1465      | 1465        | 95%         | 0         | 87.36%     | MN691820.1 MK424123.1 MT103318.1 |
| 37        | Unknown                                                               |           |             |             |           |            |                                  |
| 38        | <i>Proteus mirabilis</i>                                              | 664       | 664         | 75%         | 0         | 79.26%     | KC456537.1                       |
| 39        | <i>Providencia sp.</i>                                                | 2174      | 2174        | 93%         | 0         | 98.69%     | KF471512.1 CP027418.1            |
| 40        | <i>Providencia sp.</i>                                                | 2145      | 2145        | 93%         | 0         | 98.60%     | KX495211.1 CP027418.1            |
| 41        | Unknown                                                               |           |             |             |           |            |                                  |
| 42        | <i>Proteus mirabilis</i>                                              | 2207      | 2207        | 97%         | 0         | 98.47%     | KC456549.1                       |
| 43        | <i>Proteus mirabilis</i>                                              | 2220      | 2220        | 98%         | 0         | 97.18%     | 1432                             |
| 44        | <i>Klebsiella pneumoniae</i>                                          | 2145      | 2145        | 91%         | 0         | 99.24%     | MH788983.1                       |
| 45        | <i>Proteus mirabilis</i>                                              | 1862      | 1862        | 94%         | 0         | 95.52%     | GU384269.1                       |
| 46        | <i>Raoultella ornithinolytica</i>                                     | 2159      | 2159        | 96%         | 0         | 97.22%     | MT568560.1                       |
| 47        | <i>Klebsiella pneumoniae</i>                                          | 1437      | 1437        | 98%         | 0         | 84.36%     | MK386782.1                       |
| 48        | <i>Citrobacter farmeri</i>                                            | 2084      | 2084        | 90%         | 0         | 98.80%     | EU030438.1                       |
| 49        | <i>Fusobacterium mortiferum</i>                                       | 2187      | 2187        | 98%         | 0         | 97.93%     | LT574675.1                       |
| 50        | <i>Klebsiella oxytoca</i>                                             | 2161      | 17171       | 92%         | 0         | 97.97%     | LR133932.1                       |
| 51        | <i>Fusobacterium mortiferum</i>                                       | 784       | 784         | 70%         | 0         | 80.47%     | NR_117734.1                      |
| 52        | <i>Fusobacterium mortiferum</i>                                       | 2152      | 2152        | 98%         | 0         | 97.01%     | MN537550.1                       |
| 53        | <i>Klebsiella pneumoniae</i>                                          | 2154      | 2154        | 90%         | 0         | 99.16%     | MN208189.1                       |
| 54        | <i>Klebsiella pneumoniae</i>                                          | 2097      | 2097        | 94%         | 0         | 98.40%     | LC427681.1                       |
| 55        | Unknown                                                               |           |             |             |           |            |                                  |
| 56        | <i>Klebsiella pneumoniae</i>                                          | 584       | 584         | 63%         | 4.00E-162 | 78.25%     | MT476959.1                       |
| 57        | <i>Fusobacterium mortiferum</i>                                       | 989       | 989         | 64%         | 0         | 86.40%     | MN537550.1                       |
| 58        | <i>Klebsiella pneumoniae</i>                                          | 1282      | 1282        | 93%         | 0         | 83.26%     | KY983579.1                       |
| 59        | <i>Fusobacterium mortiferum</i>                                       | 2124      | 16987       | 93%         | 0         | 98.26%     | CP028102.1                       |
| 60        | <i>Fusobacterium mortiferum</i>                                       | 1954      | 15627       | 99%         | 0         | 94.99%     | CP028102.1                       |
| 61        | <i>Klebsiella pneumoniae</i>                                          | 1910      | 1910        | 98%         | 0         | 94.73%     | MK512007.1                       |
| 62        | <i>Escherichia coli</i>                                               | 2189      | 2189        | 96%         | 0         | 96.63%     | MN094120.1                       |
| 63        | <i>Fusobacterium mortiferum</i>                                       | 1664      | 1664        | 98%         | 0         | 88.95%     | MN537550.1                       |
| 64        | <i>Klebsiella pneumoniae</i>                                          | 2176      | 2176        | 94%         | 0         | 98.77%     | MN208189.1                       |
| 65        | <i>Fusobacterium mortiferum</i>                                       | 2169      | 2169        | 92%         | 0         | 98.77%     | LT574675.1                       |
| 66        | Unknown                                                               |           |             |             |           |            |                                  |
| 67        | <i>Fusobacterium mortiferum</i>                                       | 2193      | 2193        | 98%         | 0         | 97.20%     | MN537550.1                       |
| 68        | <i>Fusobacterium mortiferum</i>                                       | 2196      | 2196        | 97%         | 0         | 97.35%     | LT574675.1                       |
| 69        | <i>Fusobacterium mortiferum</i>                                       | 2169      | 2169        | 96%         | 0         | 97.76%     | LT574675.1                       |
| 70        | <i>Fusobacterium mortiferum</i>                                       | 2189      | 2189        | 96%         | 0         | 97.56%     | LT574675.1                       |
| 71        | <i>Klebsiella pneumoniae</i>                                          | 1644      | 1644        | 95%         | 0         | 89.67%     | KY022736.1                       |
| 72        | <i>Fusobacterium mortiferum</i>                                       | 1531      | 1531        | 92%         | 0         | 88.22%     | NR_117734.1                      |
| 73        | <i>Klebsiella pneumoniae</i>                                          | 1997      | 1997        | 97%         | 0         | 97.07%     | MK512005.1                       |
| 74        | <i>Klebsiella pneumoniae</i>                                          | 1707      | 1707        | 95%         | 0         | 89.63%     | KU937377.1                       |
| 75        | <i>Fusobacterium mortiferum</i>                                       | 2183      | 2183        | 93%         | 0         | 98.45%     | MN537550.1                       |
| 76        | <i>Klebsiella pneumoniae</i>                                          | 2200      | 2200        | 93%         | 0         | 98.23%     | MF767579.1                       |
| 77        | <i>Klebsiella pneumoniae</i>                                          | 2134      | 2134        | 86%         | 0         | 99.40%     | MK386778.1                       |
| 78        | <i>Klebsiella pneumoniae</i>                                          | 2152      | 2152        | 98%         | 0         | 99.33%     | KJ803912.1                       |
| 79        | <i>Klebsiella pneumoniae</i>                                          | 2143      | 2143        | 97%         | 0         | 99.57%     | KJ803912.1                       |
| 80        | <i>Klebsiella pneumoniae</i>                                          | 2146      | 2146        | 99%         | 0         | 99.32%     | MH111446.1                       |
| 81        | <i>Raoultella ornithinolytica</i>                                     | 2196      | 2196        | 98%         | 0         | 98.38%     | MT545114.1                       |
| 82        | <i>Enterobacter hormaechei</i>                                        | 2222      | 17601       | 97%         | 0         | 97.17%     | CP023569.1                       |
| 83        | <i>Klebsiella pneumoniae</i>                                          | 2187      | 2187        | 97%         | 0         | 96.68%     | MK386785.1                       |
| 84        | <i>Fusobacterium mortiferum</i>                                       | 2200      | 2200        | 98%         | 0         | 99.09%     | LT574675.1                       |
| 85        | <i>Fusobacterium mortiferum</i>                                       | 2248      | 2248        | 98%         | 0         | 98.65%     | LT574675.1                       |
| 86        | <i>Fusobacterium mortiferum</i>                                       | 2200      | 17592       | 98%         | 0         | 99.02%     | CP028102.1                       |
| 87        | <i>Fusobacterium mortiferum</i>                                       | 2143      | 2143        | 91%         | 0         | 98.58%     | LT574675.1                       |
| 88        | <i>Fusobacterium mortiferum</i>                                       | 2084      | 2084        | 97%         | 0         | 98.30%     | LT574675.1                       |
| 89        | <i>Klebsiella pneumoniae</i>                                          | 2215      | 2215        | 98%         | 0         | 97.06%     | MH930398.1                       |
| 90        | <i>Klebsiella oxytoca</i>                                             | 1772      | 1772        | 93%         | 0         | 90.98%     | MT326229.1                       |
| 91        | <i>Citrobacter freundii</i>                                           | 2185      | 2185        | 94%         | 0         | 98.85%     | KY378909.1                       |
| 92        | <i>Klebsiella oxytoca</i>                                             | 2130      | 16903       | 89%         | 0         | 98.74%     | LR133932.1                       |
| 93        | <i>Fusobacterium mortiferum</i>                                       | 2170      | 17356       | 94%         | 0         | 99.08%     | CP028102.1                       |
| 94        | <i>Fusobacterium mortiferum</i>                                       | 2165      | 2165        | 93%         | 0         | 98.44%     | LT574675.1                       |
| 95        | <i>Fusobacterium mortiferum</i>                                       | 2156      | 2156        | 97%         | 0         | 98.36%     | LT574675.1                       |
| 96        | <i>Kluyvera ascorbata</i>                                             | 2224      | 2224        | 98%         | 0         | 97.37%     | MT611553.1                       |

|     |                                    |      |       |     |   |        |                       |
|-----|------------------------------------|------|-------|-----|---|--------|-----------------------|
| 97  | <i>Kluyvera ascorbata</i>          | 2154 | 2154  | 95% | 0 | 99.74% | MT611553.1            |
| 98  | <i>Enterobacter asburiae</i>       | 1306 | 1306  | 85% | 0 | 87.10% | MN691251.1            |
| 99  | <i>Enterobacter sp.</i>            | 1557 | 1557  | 92% | 0 | 88.98% | MF498494.1            |
| 100 | <i>Providencia sp.</i>             | 2222 | 2222  | 98% | 0 | 98.09% | KC456588.1 CP059345.1 |
| 101 | <i>Kluyvera intermedia</i>         | 2121 | 2121  | 95% | 0 | 99.15% | MH620736.1            |
| 102 | <i>Enterobacter asburiae</i>       | 2158 | 2158  | 91% | 0 | 98.43% | MT113090.1            |
| 103 | <i>Klebsiella pneumoniae</i>       | 1537 | 1537  | 92% | 0 | 87.44% | MN208189.1            |
| 104 | <i>Fusobacterium mortiferum</i>    | 1046 | 1046  | 87% | 0 | 80.52% | NR_117734.1           |
| 105 | <i>Fusobacterium mortiferum</i>    | 2211 | 2211  | 98% | 0 | 98.24% | LT574675.1            |
| 106 | <i>Fusobacterium mortiferum</i>    | 2200 | 2200  | 92% | 0 | 99.10% | LT574675.1            |
| 107 | <i>Fusobacterium mortiferum</i>    | 2065 | 2065  | 93% | 0 | 97.75% | LT574675.1            |
| 108 | <i>Fusobacterium mortiferum</i>    | 2134 | 17060 | 92% | 0 | 98.42% | CP028102.1            |
| 109 | <i>Kluyvera ascorbata</i>          | 1273 | 1273  | 71% | 0 | 90.03% | MT611553.1            |
| 110 | <i>Providencia sp.</i>             | 2169 | 2169  | 91% | 0 | 99.50% | KX495211.1 CP027418.1 |
| 111 | <i>Klebsiella pneumoniae</i>       | 1157 | 1157  | 73% | 0 | 86.50% | LC427681.1            |
| 112 | <i>Klebsiella pneumoniae</i>       | 2146 | 2146  | 98% | 0 | 99.49% | MN208189.1            |
| 113 | <i>Enterobacter sp.</i>            | 2150 | 17079 | 95% | 0 | 98.59% | CP034336.1 CP026975.1 |
| 114 | <i>Aeromonas allosaccharophila</i> | 2041 | 2041  | 95% | 0 | 96.50% | MN208194.1            |
| 115 | <i>Citrobacter freundii</i>        | 2183 | 2183  | 98% | 0 | 96.60% | FN997639.1            |
| 116 | <i>Enterobacter sp.</i>            | 2154 | 17105 | 98% | 0 | 98.60% | CP034336.1 CP026975.1 |
| 117 | <i>Providencia sp.</i>             | 2172 | 2172  | 98% | 0 | 97.38% | KX495211.1 CP027418.1 |
| 118 | <i>Citrobacter freundii</i>        | 2146 | 2146  | 90% | 0 | 98.91% | FN997639.1            |
| 119 | <i>Aeromonas allosaccharophila</i> | 2259 | 2259  | 98% | 0 | 98.89% | MN208205.1            |
| 120 | <i>Klebsiella pneumoniae</i>       | 1676 | 1676  | 82% | 0 | 97.84% | KF413424.1            |
| 121 | <i>Providencia sp.</i>             | 2220 | 2220  | 98% | 0 | 98.48% | KX495211.1 CP027418.1 |
| 122 | <i>Providencia sp.</i>             | 2093 | 2093  | 97% | 0 | 98.72% | KX495211.1 CP027418.1 |
| 123 | <i>Fusobacterium mortiferum</i>    | 2222 | 2222  | 98% | 0 | 98.24% | LT574675.1            |
| 124 | <i>Fusobacterium mortiferum</i>    | 2180 | 2180  | 93% | 0 | 98.77% | LT574675.1            |
| 125 | <i>Fusobacterium mortiferum</i>    | 2159 | 2159  | 94% | 0 | 98.91% | LT574675.1            |
| 126 | <i>Fusobacterium mortiferum</i>    | 2041 | 2041  | 94% | 0 | 99.12% | LT574675.1            |
| 127 | <i>Fusobacterium mortiferum</i>    | 2218 | 17740 | 98% | 0 | 98.09% | CP028102.1            |
| 128 | Unknown                            |      |       |     |   |        |                       |
| 129 | <i>Aeromonas sp.</i>               | 885  | 885   | 79% | 0 | 79.73% | MK548513.1 AP022038.1 |
| 130 | <i>Fusobacterium mortiferum</i>    | 2228 | 17814 | 98% | 0 | 98.41% | CP028102.1            |
| 131 | Unknown                            | 931  | 931   | 64% | 0 | 83.39% | MT367864.1 MN691895.1 |
| 132 | <i>Fusobacterium mortiferum</i>    | 2061 | 2061  | 89% | 0 | 99.47% | LT574675.1            |
| 133 | <i>Klebsiella oxytoca</i>          | 2071 | 2071  | 98% | 0 | 98.70% | MT271953.1            |
| 134 | <i>Klebsiella michiganensis</i>    | 1781 | 1781  | 95% | 0 | 92.33% | MT509875.1            |
| 135 | <i>Klebsiella sp.</i>              | 2097 | 2097  | 97% | 0 | 99.22% | MK560009.1 KR824099.1 |
| 136 | <i>Klebsiella oxytoca</i>          | 2124 | 2124  | 93% | 0 | 98.42% | MT509912.1            |
| 137 | <i>Fusobacterium mortiferum</i>    | 2252 | 2252  | 98% | 0 | 98.42% | LT574675.1            |
| 138 | <i>Providencia vermicola</i>       | 1803 | 1803  | 88% | 0 | 96.62% | KC456588.1            |
| 139 | <i>Fusobacterium mortiferum</i>    | 2242 | 17932 | 98% | 0 | 98.72% | CP028102.1            |
| 140 | <i>Fusobacterium mortiferum</i>    | 1808 | 1808  | 93% | 0 | 93.10% | LT574675.1            |
| 141 | <i>Fusobacterium mortiferum</i>    | 2139 | 2139  | 91% | 0 | 98.90% | LT574675.1            |
| 142 | <i>Fusobacterium mortiferum</i>    | 2069 | 16543 | 90% | 0 | 98.13% | CP028102.1            |
| 143 | <i>Klebsiella pneumoniae</i>       | 2215 | 2215  | 99% | 0 | 96.99% | MH396723.1            |
| 144 | <i>Klebsiella pneumoniae</i>       | 1816 | 1816  | 92% | 0 | 92.70% | MH930397.1            |
| 145 | <i>Klebsiella pneumoniae</i>       | 2189 | 2189  | 91% | 0 | 99.83% | KJ803912.1            |
| 146 | <i>Fusobacterium mortiferum</i>    | 2187 | 2187  | 98% | 0 | 97.85% | LT574675.1            |
| 147 | <i>Providencia sp.</i>             | 2206 | 2206  | 98% | 0 | 98.86% | KX495211.1 CP027418.1 |
| 148 | <i>Providencia vermicola</i>       | 1943 | 1943  | 94% | 0 | 96.41% | KC456565.1            |
| 149 | <i>Klebsiella sp.</i>              | 2156 | 2156  | 90% | 0 | 99.16% | HQ259959.1 MK560009.1 |
| 150 | <i>Klebsiella pneumoniae</i>       | 2174 | 2174  | 89% | 0 | 99.41% | JQ838151.1            |
| 151 | <i>Klebsiella variicola</i>        | 2076 | 2076  | 98% | 0 | 96.29% | KJ803944.1            |
| 152 | <i>Bacteroides fragilis</i>        | 1279 | 1279  | 87% | 0 | 86.06% | KP944139.1            |
| 153 | <i>Enterobacter sp.</i>            | 2143 | 17016 | 98% | 0 | 98.75% | CP034336.1 CP010512.1 |
| 154 | <i>Bacteroides fragilis</i>        | 2204 | 2204  | 98% | 0 | 98.46% | KP944137.1            |
| 155 | <i>Bacteroides fragilis</i>        | 2115 | 2115  | 93% | 0 | 99.06% | KP944136.1            |
| 156 | <i>Bacteroides fragilis</i>        | 2220 | 13324 | 98% | 0 | 97.59% | CP036555.1            |
| 157 | <i>Bacteroides fragilis</i>        | 2204 | 2204  | 99% | 0 | 98.62% | KP944137.1            |
| 158 | <i>Kluyvera ascorbata</i>          | 2185 | 2185  | 94% | 0 | 98.61% | KY938088.1            |
| 159 | <i>Bacteroides fragilis</i>        | 2222 | 2222  | 92% | 0 | 98.87% | KP944139.1            |
| 160 | <i>Providencia sp.</i>             | 2230 | 2230  | 98% | 0 | 97.38% | KX495211.1 CP027418.1 |
| 161 | <i>Bacteroides fragilis</i>        | 2248 | 2248  | 98% | 0 | 97.83% | KP944142.1            |
| 162 | <i>Klebsiella oxytoca</i>          | 2126 | 16902 | 89% | 0 | 98.74% | LR133932.1            |
| 163 | <i>Fusobacterium mortiferum</i>    | 2137 | 2137  | 92% | 0 | 98.50% | LT574675.1            |
| 164 | <i>Klebsiella oxytoca</i>          | 1869 | 14837 | 93% | 0 | 95.24% | LR133932.1            |
| 165 | <i>Fusobacterium mortiferum</i>    | 2194 | 2194  | 97% | 0 | 97.63% | MN537550.1            |
| 166 | <i>Fusobacterium mortiferum</i>    | 2202 | 17607 | 97% | 0 | 97.50% | CP028102.1            |
| 167 | <i>Fusobacterium mortiferum</i>    | 2187 | 17489 | 97% | 0 | 97.48% | CP028102.1            |
| 168 | <i>Klebsiella pneumoniae</i>       | 2159 | 2159  | 91% | 0 | 99.49% | KJ803912.1            |
| 169 | <i>Fusobacterium mortiferum</i>    | 2163 | 2163  | 96% | 0 | 97.24% | LT574675.1            |
| 170 | <i>Klebsiella pneumoniae</i>       | 2180 | 2180  | 91% | 0 | 98.85% | KP241788.1            |
| 171 | <i>Klebsiella pneumoniae</i>       | 2163 | 2163  | 91% | 0 | 98.68% | KJ803912.1            |
| 172 | <i>Fusobacterium mortiferum</i>    | 2172 | 2172  | 96% | 0 | 97.55% | LT574675.1            |
| 173 | <i>Enterobacter sp.</i>            | 2141 | 17007 | 95% | 0 | 98.51% | CP034336.1 CP010512.1 |
| 174 | <i>Fusobacterium mortiferum</i>    | 2121 | 2121  | 92% | 0 | 98.82% | LT574675.1            |
| 175 | <i>Bacteroides fragilis</i>        | 2218 | 2218  | 99% | 0 | 97.60% | KP944137.1            |
| 176 | <i>Bacteroides fragilis</i>        | 2196 | 2196  | 98% | 0 | 97.51% | KP944141.1            |
| 177 | <i>Bacteroides fragilis</i>        | 2228 | 2228  | 98% | 0 | 97.97% | KP326374.1            |
| 178 | <i>Bacteroides fragilis</i>        | 2252 | 13402 | 99% | 0 | 98.07% | CP011073.1            |
| 179 | <i>Bacteroides fragilis</i>        | 2213 | 2213  | 99% | 0 | 98.03% | KP944140.1            |
| 180 | <i>Bacteroides fragilis</i>        | 2191 | 2191  | 99% | 0 | 97.28% | KP944141.1            |
| 181 | <i>Bacteroides fragilis</i>        | 2183 | 12994 | 98% | 0 | 97.36% | CP011073.1            |
| 182 | <i>Bacteroides stercoris</i>       | 2146 | 2146  | 99% | 0 | 97.14% | MK743935.1            |
| 183 | <i>Providencia sp.</i>             | 2161 | 2161  | 92% | 0 | 98.77% | MK780045.1 CP027418.1 |
| 184 | <i>Bacteroides fragilis</i>        | 2202 | 13075 | 98% | 0 | 97.51% | CP043610.1            |
| 185 | <i>Bacteroides fragilis</i>        | 2217 | 2217  | 96% | 0 | 97.31% | KP944136.1            |
| 186 | Unknown                            |      |       |     |   |        |                       |
| 187 | <i>Bacteroides dorei</i>           | 2004 | 13972 | 98% | 0 | 94.87% | CP046427.1            |
| 188 | <i>Fusobacterium mortiferum</i>    | 2187 | 2187  | 98% | 0 | 97.92% | MN537550.1            |
| 189 | <i>Klebsiella pneumoniae</i>       | 1358 | 1358  | 94% | 0 | 84.08% | LC427681.1            |
| 190 | <i>Fusobacterium mortiferum</i>    | 1655 | 1655  | 88% | 0 | 93.04% | MN537550.1            |
| 191 | Unknown                            |      |       |     |   |        |                       |
| 192 | <i>Fusobacterium mortiferum</i>    | 2154 | 2154  | 93% | 0 | 99.00% | MN537550.1            |
| 193 | <i>Fusobacterium mortiferum</i>    | 2167 | 17326 | 98% | 0 | 96.61% | CP028102.1            |
| 194 | <i>Fusobacterium mortiferum</i>    | 2198 | 2198  | 99% | 0 | 97.65% | MN537550.1            |
| 195 | <i>Fusobacterium mortiferum</i>    | 1762 | 1762  | 90% | 0 | 94.68% | MN537550.1            |
| 196 | <i>Fusobacterium mortiferum</i>    | 2194 | 2194  | 97% | 0 | 97.42% | MN537550.1            |

|         |                                   |      |       |     |   |        |                       |
|---------|-----------------------------------|------|-------|-----|---|--------|-----------------------|
| 197     | <i>Fusobacterium mortiferum</i>   | 2233 | 2233  | 97% | 0 | 97.82% | LT574675.1            |
| 198     | <i>Fusobacterium mortiferum</i>   | 2172 | 2172  | 94% | 0 | 98.37% | MN537550.1            |
| 199     | <i>Enterobacter sp.</i>           | 2152 | 16990 | 95% | 0 | 98.44% | CP034336.1 CP026975.1 |
| 200     | <i>Fusobacterium mortiferum</i>   | 2213 | 2213  | 98% | 0 | 97.74% | MN537550.1            |
| 201     | <i>Bacteroides fragilis</i>       | 2254 | 13524 | 98% | 0 | 98.06% | CP036555.1            |
| Control | <i>Bacteroides fragilis</i>       |      |       |     |   |        |                       |
| Control | <i>Parabacteroides distasonis</i> |      |       |     |   |        |                       |
| Control | <i>Escherichia coli</i>           |      |       |     |   |        |                       |
| Control | <i>Klebsiella pneumoniae</i>      |      |       |     |   |        |                       |

Table S1. The results of the first stage of research. Continued

| No strain | Presence of bfr | Merium |   |   |   |   |   |   |
|-----------|-----------------|--------|---|---|---|---|---|---|
|           |                 | 0      | 1 | 2 | 3 | 4 | 5 | 6 |
| 1         | 0               | 1      | ~ | 1 | 1 | ~ | 0 | ~ |
| 2         | 1               | 1      | 1 | 1 | 1 | 1 | 1 | 1 |
| 3         | 0               | 1      | 1 | 1 | 1 | 1 | 1 | 1 |
| 4         | 0               | 1      | 1 | 1 | 1 | 1 | 0 | 1 |
| 5         | 0               | 0      | 0 | ~ | ~ | 0 | 0 | ~ |
| 6         | 0               | 1      | 1 | 1 | 1 | ~ | 1 | 1 |
| 7         | 0               | 1      | 1 | 1 | 1 | ~ | 1 | 1 |
| 8         | 0               | 1      | 1 | 0 | 0 | 0 | 0 | 0 |
| 9         | 0               | 1      | 1 | 1 | 1 | ~ | ~ | 1 |
| 10        | 1               | 1      | 1 | 0 | ~ | 0 | 0 | 0 |
| 11        | 0               | 1      | 0 | 1 | 1 | ~ | 0 | ~ |
| 12        | 0               | 1      | 1 | 1 | 1 | 1 | 1 | 1 |
| 13        | 0               | 1      | ~ | 1 | 1 | ~ | 1 | ~ |
| 14        | 0               | 1      | 1 | ~ | 1 | ~ | 1 | ~ |
| 15        | 0               | 1      | 0 | ~ | ~ | 0 | 0 | 0 |
| 16        | 0               | 1      | 1 | 1 | 1 | ~ | 1 | 1 |
| 17        | 0               | 1      | 0 | 1 | 1 | ~ | ~ | 1 |
| 18        | 0               | 1      | 0 | 1 | 1 | ~ | 0 | 1 |
| 19        | 0               | 1      | 1 | 1 | 1 | 0 | 1 | 1 |
| 20        | 0               | 0      | 0 | 0 | 0 | 0 | 0 | 0 |
| 21        | 0               | 0      | ~ | 0 | 1 | 1 | 1 | ~ |
| 22        | 0               | 0      | ~ | 0 | 1 | ~ | 1 | ~ |
| 23        | 0               | 1      | 1 | 1 | 1 | 0 | 1 | 1 |
| 24        | 0               | 1      | 1 | 1 | 1 | 0 | 1 | 1 |
| 25        | 0               | 1      | 1 | 1 | 1 | 1 | 1 | 1 |
| 26        | 0               | 1      | 1 | 1 | 1 | 1 | 1 | 1 |
| 27        | 0               | 1      | 1 | 1 | 1 | 1 | 1 | 1 |
| 28        | 0               | 1      | ~ | ~ | 1 | ~ | ~ | 1 |
| 29        | 0               | 1      | 1 | 1 | 1 | 1 | 1 | 1 |
| 30        | 0               | 1      | 1 | 0 | 1 | 0 | 0 | 1 |
| 31        | 0               | 1      | 1 | 1 | 1 | 1 | 1 | 1 |
| 32        | 0               | 1      | 1 | 1 | 1 | 1 | 1 | 1 |
| 33        | 0               | 1      | 1 | 1 | 1 | 1 | 1 | 1 |
| 34        | 1               | 1      | 1 | 1 | 1 | 1 | 1 | 1 |
| 35        | 0               | 1      | 1 | 1 | 1 | 1 | 1 | 1 |
| 36        | 0               | 1      | 1 | ~ | 1 | 1 | 1 | 1 |
| 37        | 0               | 1      | 1 | 1 | 1 | 1 | 1 | 1 |
| 38        | 0               | 1      | 1 | 1 | 1 | 1 | 1 | 1 |
| 39        | 1               | 1      | 1 | 1 | 1 | 1 | 1 | 1 |
| 40        | 0               | 1      | 1 | 1 | 1 | 1 | 1 | 1 |
| 41        | 0               | 1      | ~ | ~ | 1 | 1 | 1 | 1 |
| 42        | 0               | 1      | 1 | 1 | 1 | 1 | 1 | 1 |
| 43        | 1               | 1      | 1 | 1 | 1 | 1 | 1 | 1 |
| 44        | 0               | 1      | 1 | 1 | 1 | 1 | 1 | 1 |
| 45        | 1               | 1      | 1 | 1 | 1 | 1 | ~ | 1 |
| 46        | 0               | 1      | 1 | 1 | 1 | 1 | ~ | 1 |
| 47        | 0               | 1      | ~ | 1 | 1 | ~ | ~ | 1 |
| 48        | 0               | 1      | ~ | 1 | 1 | 1 | ~ | 1 |
| 49        | 0               | 1      | ~ | ~ | 1 | ~ | ~ | 1 |
| 50        | 0               | 1      | 1 | 1 | 1 | 1 | 1 | 1 |
| 51        | 0               | 1      | 1 | 1 | 1 | 1 | 1 | 1 |
| 52        | 0               | ~      | ~ | 1 | 1 | ~ | 0 | 1 |
| 53        | 0               | 1      | 1 | 1 | 1 | 1 | 1 | 1 |
| 54        | 0               | 1      | 1 | 1 | 1 | 1 | 1 | 1 |
| 55        | 0               | 1      | 1 | 1 | 1 | 1 | 1 | 1 |
| 56        | 0               | 1      | 1 | 1 | 1 | 1 | 1 | 1 |
| 57        | 0               | 1      | 1 | 1 | 1 | 1 | 1 | 1 |
| 58        | 0               | 1      | 1 | 1 | 1 | 1 | 1 | 1 |
| 59        | 0               | 1      | 1 | 1 | 1 | 1 | 1 | 1 |
| 60        | 0               | 1      | 1 | 1 | 1 | 1 | 1 | 1 |
| 61        | 0               | 1      | 1 | 1 | 1 | 1 | 1 | 1 |
| 62        | 0               | 1      | ~ | 1 | 1 | ~ | ~ | 1 |
| 63        | 0               | 1      | ~ | 1 | 1 | ~ | ~ | 1 |
| 64        | 0               | 1      | 1 | 1 | 1 | 1 | 1 | 1 |
| 65        | 0               | 1      | 1 | ~ | ~ | 1 | 0 | 1 |
| 66        | 0               | 0      | 0 | 0 | 0 | 0 | 0 | 0 |
| 67        | 0               | 1      | 1 | 1 | 1 | 1 | 0 | 1 |
| 68        | 0               | 0      | 0 | 0 | 0 | 0 | 0 | 0 |
| 69        | 0               | 1      | 1 | 1 | 1 | 0 | 0 | 1 |
| 70        | 0               | 1      | 1 | 1 | 1 | 1 | 0 | 1 |
| 71        | 0               | 1      | 1 | 1 | 1 | 1 | 1 | 1 |
| 72        | 0               | 1      | 1 | 1 | 1 | 1 | 1 | 1 |
| 73        | 0               | 1      | 1 | 1 | 1 | 1 | 1 | 1 |
| 74        | 0               | 1      | 1 | 1 | 1 | 1 | 1 | 1 |
| 75        | 0               | ~      | 1 | 1 | ~ | 0 | 0 | 1 |
| 76        | 0               | 1      | ~ | 1 | 1 | 1 | 1 | 1 |
| 77        | 0               | 1      | 1 | 1 | 1 | 1 | 1 | 1 |
| 78        | 0               | 1      | 1 | 1 | 1 | 1 | 1 | 1 |
| 79        | 0               | 1      | 1 | 1 | 1 | 1 | 1 | 1 |
| 80        | 0               | 1      | 1 | 1 | 1 | 1 | 1 | 1 |
| 81        | 0               | 1      | 1 | 1 | 1 | 1 | 1 | 1 |
| 82        | 0               | 1      | 1 | 1 | 1 | 1 | 1 | 1 |
| 83        | 0               | 1      | ~ | 1 | 1 | 1 | 1 | 1 |
| 84        | 0               | 1      | ~ | 1 | 1 | ~ | 0 | 1 |
| 85        | 0               | 1      | ~ | 1 | 1 | ~ | 0 | 1 |
| 86        | 0               | 1      | ~ | 1 | 1 | 1 | 0 | 1 |
| 87        | 0               | 1      | 1 | 1 | 1 | 1 | 1 | 1 |
| 88        | 0               | ~      | ~ | 1 | ~ | 0 | 0 | 1 |
| 89        | 0               | 1      | 1 | 1 | 1 | 0 | 1 | 1 |
| 90        | 0               | 1      | ~ | 1 | 1 | 0 | 1 | 1 |
| 91        | 0               | 1      | 1 | 1 | 1 | 0 | ~ | 1 |
| 92        | 0               | 1      | 1 | 1 | 1 | ~ | 1 | 1 |
| 93        | 0               | 1      | ~ | 1 | 1 | 0 | 0 | 1 |
| 94        | 0               | ~      | ~ | 1 | 1 | 0 | ~ | ~ |
| 95        | 0               | 1      | 1 | ~ | 1 | ~ | 0 | 1 |
| 96        | 0               | 1      | ~ | ~ | 1 | ~ | 1 | 1 |

|     |   |   |   |   |   |   |   |   |
|-----|---|---|---|---|---|---|---|---|
| 97  | 0 | 1 | ~ | 1 | 1 | 1 | 1 | 1 |
| 98  | 1 | ~ | 1 | 1 | 1 | 1 | 1 | 1 |
| 99  | 1 | 1 | 1 | 1 | 1 | ~ | 1 | 1 |
| 100 | 0 | ~ | 1 | 1 | 1 | 1 | 0 | 1 |
| 101 | 0 | 1 | 0 | 0 | 1 | 0 | 1 | 1 |
| 102 | 0 | 1 | 1 | 1 | 1 | ~ | 0 | 1 |
| 103 | 1 | 0 | 1 | 1 | 0 | 0 | 1 | 1 |
| 104 | 0 | 1 | 1 | 1 | 1 | 1 | 1 | 1 |
| 105 | 0 | 1 | 1 | 1 | 1 | 1 | 1 | 1 |
| 106 | 1 | 1 | 1 | 1 | 1 | 1 | 1 | 1 |
| 107 | 0 | 1 | 1 | 1 | 1 | ~ | 1 | 1 |
| 108 | 0 | 1 | 0 | 1 | 1 | ~ | 0 | 1 |
| 109 | 0 | 1 | 1 | 1 | 1 | 1 | 1 | 1 |
| 110 | 0 | 1 | 1 | ~ | 1 | 1 | 1 | 1 |
| 111 | 0 | 1 | 1 | 1 | 1 | 1 | 1 | 1 |
| 112 | 0 | 1 | 1 | 1 | 1 | 1 | 1 | 1 |
| 113 | 0 | 1 | 1 | 1 | 1 | 1 | 1 | 1 |
| 114 | 0 | 1 | 0 | 0 | 1 | 0 | 0 | 0 |
| 115 | 0 | 1 | 0 | 0 | 1 | 0 | 0 | 0 |
| 116 | 1 | 1 | ~ | 1 | 1 | ~ | 0 | ~ |
| 117 | 0 | 1 | 1 | 1 | 1 | 1 | ~ | ~ |
| 118 | 0 | 1 | 0 | 0 | 1 | 0 | 0 | 0 |
| 119 | 0 | 0 | 0 | 0 | 0 | 0 | 0 | 0 |
| 120 | 0 | 1 | 1 | 1 | 1 | 1 | 1 | 1 |
| 121 | 0 | 1 | 0 | ~ | 1 | ~ | 0 | ~ |
| 122 | 0 | 1 | 1 | 1 | 1 | 1 | 0 | ~ |
| 123 | 1 | 1 | 1 | 1 | 1 | 1 | ~ | 1 |
| 124 | 1 | 1 | 1 | 1 | 1 | 1 | 1 | 1 |
| 125 | 0 | 1 | 1 | 1 | 1 | 1 | 1 | 1 |
| 126 | 0 | 1 | 1 | 1 | 1 | 1 | 1 | 1 |
| 127 | 0 | 1 | 1 | 1 | 1 | 1 | 0 | ~ |
| 128 | 0 | ~ | 1 | 1 | 1 | ~ | 0 | ~ |
| 129 | 1 | 1 | 1 | 1 | 1 | 1 | 0 | 1 |
| 130 | 0 | 1 | 1 | 1 | 1 | 0 | 0 | 1 |
| 131 | 0 | 1 | 0 | 1 | 1 | 0 | 1 | 1 |
| 132 | 0 | 1 | 0 | 1 | ~ | ~ | 1 | 1 |
| 133 | 0 | 1 | ~ | 0 | ~ | 0 | 1 | 1 |
| 134 | 0 | ~ | ~ | 1 | 1 | 0 | ~ | 1 |
| 135 | 1 | 1 | 1 | 1 | 1 | 1 | 1 | 1 |
| 136 | 1 | 1 | 0 | 1 | 1 | 0 | 0 | 1 |
| 137 | 0 | 1 | 1 | 1 | 1 | 1 | 1 | 1 |
| 138 | 1 | 0 | 0 | 0 | 0 | 0 | 0 | 0 |
| 139 | 0 | 1 | 1 | 1 | 1 | 1 | 0 | 1 |
| 140 | 1 | ~ | 1 | 1 | 1 | 0 | 0 | 1 |
| 141 | 0 | 1 | 1 | 1 | 1 | 1 | 1 | 1 |
| 142 | 0 | 1 | 1 | 1 | 1 | 1 | 1 | 1 |
| 143 | 0 | 1 | 1 | 1 | 1 | 1 | 1 | 1 |
| 144 | 1 | 1 | 1 | 1 | 1 | 1 | 1 | 1 |
| 145 | 0 | 1 | 1 | 1 | 1 | 1 | 1 | 1 |
| 146 | 0 | 1 | ~ | 1 | 1 | 0 | 0 | 1 |
| 147 | 0 | 1 | 1 | 1 | 1 | 1 | 1 | 1 |
| 148 | 1 | 1 | 1 | 1 | 1 | 1 | 1 | 1 |
| 149 | 0 | 1 | 1 | 1 | 1 | 1 | 1 | 1 |
| 150 | 0 | 1 | 1 | 1 | 1 | 1 | 1 | 1 |
| 151 | 0 | 1 | 1 | 1 | 1 | 1 | 1 | 1 |
| 152 | 1 | 1 | ~ | 1 | 1 | 1 | 0 | 0 |
| 153 | 0 | 1 | ~ | 1 | 1 | 0 | 1 | ~ |
| 154 | 1 | 1 | ~ | 0 | ~ | 1 | ~ | ~ |
| 155 | 1 | 1 | ~ | 0 | ~ | 1 | ~ | ~ |
| 156 | 1 | 1 | ~ | 0 | ~ | 1 | ~ | ~ |
| 157 | 1 | 1 | ~ | 0 | ~ | 0 | ~ | ~ |
| 158 | 0 | 1 | 1 | 1 | 1 | 1 | 0 | 1 |
| 159 | 1 | 1 | ~ | 0 | ~ | 0 | ~ | 0 |
| 160 | 0 | 1 | 1 | 1 | 1 | 1 | 1 | 1 |
| 161 | 1 | 1 | 1 | 1 | ~ | 1 | 0 | 0 |
| 162 | 1 | 1 | 1 | 1 | 1 | 1 | 1 | 1 |
| 163 | 0 | ~ | ~ | ~ | ~ | 1 | 0 | 1 |
| 164 | 0 | 1 | 1 | 1 | 1 | ~ | 1 | 1 |
| 165 | 0 | 0 | 0 | 0 | 0 | 0 | 0 | 0 |
| 166 | 0 | 0 | 0 | 0 | 0 | 0 | 0 | 0 |
| 167 | 0 | 1 | 1 | ~ | 1 | 1 | 1 | 1 |
| 168 | 0 | 1 | 1 | 1 | 1 | 1 | 1 | 1 |
| 169 | 0 | 1 | ~ | 1 | 1 | 1 | 0 | ~ |
| 170 | 0 | 1 | 1 | 1 | 1 | 1 | 1 | 1 |
| 171 | 0 | 1 | 1 | 1 | 1 | 1 | 1 | 1 |
| 172 | 0 | ~ | ~ | ~ | ~ | 0 | 0 | ~ |
| 173 | 0 | 1 | ~ | ~ | ~ | 0 | 1 | 0 |
| 174 | 0 | 0 | 0 | 0 | 0 | 0 | ~ | 0 |
| 175 | 1 | 1 | ~ | 1 | 1 | 1 | 0 | ~ |
| 176 | 1 | 1 | ~ | ~ | ~ | 0 | 0 | 0 |
| 177 | 1 | ~ | 1 | ~ | ~ | 1 | ~ | ~ |
| 178 | 1 | 0 | ~ | 0 | 0 | 0 | ~ | 0 |
| 179 | 1 | 0 | ~ | 0 | 1 | 1 | 1 | 1 |
| 180 | 1 | ~ | 1 | 1 | 1 | 1 | 1 | 1 |
| 181 | 1 | ~ | 1 | 1 | 1 | 1 | 1 | 1 |
| 182 | 1 | 0 | 0 | 0 | 0 | 0 | 0 | 0 |
| 183 | 0 | ~ | ~ | 0 | 1 | 1 | 1 | 1 |
| 184 | 1 | 0 | 0 | ~ | 0 | 0 | 0 | 0 |
| 185 | 1 | 0 | 1 | ~ | 0 | 0 | ~ | 0 |
| 186 | 0 | ~ | 1 | 1 | 1 | 1 | 1 | 1 |
| 187 | 1 | 0 | 1 | 1 | 0 | 0 | 0 | 0 |
| 188 | 0 | 1 | ~ | 1 | 1 | ~ | 0 | 1 |
| 189 | 0 | 1 | 1 | 1 | 1 | 1 | 1 | 1 |
| 190 | 0 | 1 | ~ | 1 | ~ | ~ | 0 | 1 |
| 191 | 0 | ~ | ~ | 1 | ~ | ~ | 0 | 1 |
| 192 | 0 | ~ | ~ | ~ | ~ | ~ | 0 | 1 |
| 193 | 0 | 1 | 1 | 1 | 1 | ~ | 0 | 1 |
| 194 | 0 | 1 | ~ | 1 | 1 | ~ | 0 | 1 |
| 195 | 0 | 1 | ~ | 1 | 1 | ~ | 0 | 1 |
| 196 | 0 | 1 | ~ | 1 | 1 | ~ | 0 | 1 |

|         |   |   |   |   |   |   |   |   |
|---------|---|---|---|---|---|---|---|---|
| 197     | 0 | 1 | ~ | 1 | 1 | ~ | 0 | 1 |
| 198     | 0 | 1 | 1 | 1 | 1 | ~ | 0 | 1 |
| 199     | 0 | 1 | 1 | 1 | 1 | 1 | 1 | 1 |
| 200     | 0 | 1 | 1 | 1 | 1 | 1 | 1 | 1 |
| 201     | 1 | 1 | 1 | 1 | 1 | 1 | ~ | 1 |
| Control | 1 | 1 | 1 | 1 | 1 | 1 | ~ | 1 |
| Control | 1 | 1 | 1 | 1 | 1 | 1 | 0 | 1 |
| Control | 0 | ~ | ~ | ~ | ~ | ~ | 1 | ~ |
| Control | 0 | 1 | ~ | 1 | 1 | 0 | 1 | 1 |

Growth of isolates on medium:  
normal growth      1  
inhibited            ~  
no growth            0



Table S3. The results of the third stage of research

| No strain | Strain identification                 |           |             |             |           |            |             | Presence of <i>bfr</i> gene* |
|-----------|---------------------------------------|-----------|-------------|-------------|-----------|------------|-------------|------------------------------|
|           | Identification results                | Max Score | Total Score | Query Cover | E value   | Per. Ident | Accession   |                              |
| 1         | <i>Klebsiella pneumoniae</i>          | 2054      | 2054        | 98%         | 0         | 98.37%     | MK386776.1  | 0                            |
| 2         | <i>Klebsiella pneumoniae</i>          | 2021      | 2021        | 98%         | 0         | 97.85%     | MT225793.1  | 0                            |
| 3         | <i>Parabacteroides distasonis</i>     | 1622      | 11191       | 96%         | 0         | 91.57%     | CP050956.1  | 1                            |
| 4         | <i>Providencia vermicola</i>          | 2124      | 2124        | 98%         | 0         | 98.98%     | KX495211.1  | 0                            |
| 5         | <i>Bacteroides thetaiotaomicron</i>   | 1842      | 9072        | 94%         | 0         | 95.87%     | AP022660.1  | 1                            |
| 6         | <i>Bacteroides koreensis</i>          | 1469      | 1469        | 97%         | 0         | 85.95%     | NR_159117.1 | 1                            |
| 7         | <i>Bacteroides fragilis</i>           | 2097      | 12510       | 97%         | 0         | 99.14%     | CP012706.1  | 1                            |
| 8         | <i>Enterococcus faecium</i>           | 2060      | 2060        | 94%         | 0         | 97.87%     | JX275805.1  | 0                            |
| 9         | <i>Bacteroides fragilis</i>           | 2145      | 2145        | 97%         | 0         | 98.59%     | KP944140.1  | 1                            |
| 10        | -                                     |           |             |             |           |            |             | 1                            |
| 11        | <i>Bacteroides ovatus</i>             | 1932      | 1932        | 95%         | 0         | 96.11%     | MT902975.1  | 1                            |
| 12        | <i>Bacteroides fragilis</i>           | 1674      | 1674        | 91%         | 0         | 93.56%     | MT268985.1  | 1                            |
| 13        | <i>Bacteroides vulgatus</i>           | 2143      | 2143        | 97%         | 0         | 98.99%     | JN084208.2  | 1                            |
| 14        | <i>Bacteroides dorei</i>              | 1711      | 1711        | 80%         | 0         | 97.93%     | MT464306.1  | 1                            |
| 15        | <i>Parabacteroides distasonis</i>     | 2106      | 2106        | 97%         | 0         | 97.07%     | MK696408.1  | 1                            |
| 16        | <i>Parabacteroides distasonis</i>     | 1882      | 1882        | 97%         | 0         | 95.05%     | MK696408.1  | 1                            |
| 17        | <i>Erysipelatoclostridium ramosum</i> | 2154      | 2154        | 95%         | 0         | 98.52%     | MN913787.1  | 0                            |
| 18        | <i>Erysipelatoclostridium ramosum</i> | 2163      | 2163        | 97%         | 0         | 98.29%     | MN913787.1  | 0                            |
| 19        | <i>Enterococcus faecalis</i>          | 2132      | 2132        | 97%         | 0         | 99.32%     | MT611645.1  | 1                            |
| 20        | <i>Bacteroides dorei</i>              | 2156      | 2156        | 96%         | 0         | 99.16%     | MT464394.1  | 1                            |
| 21        | <i>Erysipelatoclostridium ramosum</i> | 2145      | 2145        | 97%         | 0         | 99.08%     | MN913787.1  | 0                            |
| 22        | <i>Enterococcus faecalis</i>          | 2132      | 2132        | 97%         | 0         | 99.32%     | MT611645.1  | 1                            |
| 23        | <i>Enterococcus faecalis</i>          | 2158      | 2158        | 97%         | 0         | 98.99%     | MT544954.1  | 0                            |
| 24        | <i>Enterococcus faecalis</i>          | 2170      | 2170        | 95%         | 0         | 99.33%     | MG188317.1  | 0                            |
| 25        | <i>Amedibacillus dolichus</i>         | 1886      | 1886        | 96%         | 0         | 97.90%     | MN567556.1  | 1                            |
| 26        | <i>Bacteroides dorei</i>              | 1077      | 1077        | 74%         | 0         | 87.36%     | MT464394.1  | 1                            |
| 27        | <i>Enterococcus sp.</i>               | 1482      | 1482        | 75%         | 0         | 94.96%     | MH111646.1  | 0                            |
| 28        | <i>Enterococcus faecalis</i>          | 887       | 887         | 89%         | 0         | 89.22%     | MH385354.1  | 0                            |
| 29        | <i>Enterococcus faecium</i>           | 1975      | 1975        | 98%         | 0         | 97.42%     | MN474019.1  | 0                            |
| 30        | <i>Enterococcus faecalis</i>          | 1940      | 1940        | 97%         | 0         | 96.52%     | MG694616.1  | 0                            |
| 31        | <i>Enterococcus faecalis</i>          | 2194      | 2194        | 98%         | 0         | 99.75%     | MT611694.1  | 0                            |
| 32        | <i>Enterococcus faecalis</i>          | 2176      | 2176        | 96%         | 0         | 99.41%     | MT611694.1  | 0                            |
| 33        | <i>Enterococcus faecium</i>           | 2128      | 2128        | 94%         | 0         | 97.80%     | MT544955.1  | 0                            |
| 34        | <i>Bacteroides sp.</i>                | 1751      | 1751        | 93%         | 0         | 94.20%     | NR_159117.1 | 1                            |
| 35        | <i>Enterococcus faecalis</i>          | 1908      | 1908        | 97%         | 0         | 98.51%     | KY962905.1  | 0                            |
| 36        | <i>Enterococcus faecium</i>           | 2154      | 2154        | 96%         | 0         | 99.16%     | MT573567.1  | 0                            |
| 37        | <i>Bacteroides eggerthii</i>          | 2097      | 2097        | 98%         | 0         | 99.14%     | MN537524.1  | 1                            |
| 38        | <i>Bacteroides fragilis</i>           | 2047      | 12283       | 98%         | 0         | 98.20%     | CP036555.1  | 1                            |
| 39        | <i>Bacteroides uniformis</i>          | 1661      | 1661        | 79%         | 0         | 97.58%     | KP944145.1  | 1                            |
| 40        | <i>Dysgonomonas sp.</i>               | 2132      | 2132        | 97%         | 0         | 99.66%     | MW175551.1  | 0                            |
| 41        | <i>Bacteroides sp.</i>                | 2156      | 2156        | 98%         | 0         | 97.81%     | NR_113065.1 | 1                            |
| 42        | <i>Bacteroides stercoris</i>          | 2049      | 2049        | 96%         | 0         | 98.11%     | LC515591.1  | 1                            |
| 43        | <i>Dysgonomonas sp.</i>               | 2134      | 2134        | 97%         | 0         | 98.82%     | MN646999.1  | 0                            |
| 44        | <i>Dysgonomonas sp.</i>               | 2146      | 2146        | 97%         | 0         | 98.75%     | MN646999.1  | 0                            |
| 45        | <i>Bacteroides sp.</i>                | 2141      | 2141        | 98%         | 0         | 98.83%     | EU728710.1  | 1                            |
| 46        | <i>Bacteroides sp.</i>                | 2167      | 2167        | 98%         | 0         | 98.13%     | EU728710.1  | 1                            |
| 47        | <i>Dysgonomonas sp.</i>               | 2082      | 2082        | 96%         | 0         | 98.71%     | NR_113135.1 | 0                            |
| 48        | <i>Bacteroides stercoris</i>          | 536       | 536         | 96%         | 3.00E-148 | 93.93%     | AB714304.1  | 1                            |
| 49        | <i>Dysgonomonas sp.</i>               | 2178      | 2178        | 97%         | 0         | 99.09%     | MN646999.1  | 0                            |
| 50        | <i>Bacteroides sp.</i>                | 1989      | 1989        | 98%         | 0         | 97.38%     | NR_113065.1 | 1                            |
| 51        | <i>Bacteroides sp.</i>                | 2122      | 2122        | 97%         | 0         | 97.64%     | NR_112893.1 | 1                            |

\*Presence of *bfr* gene:

- 0 absence  
1 presence
